# Supplementary material for: Empirical Data Suggest That the Kashmir Musk Deer (Moschus cupreus, Grubb 1982) Is the One Musk Deer Distributed in the Western Himalayas: An Integration of Ecology, Genetics and Geospatial Modelling Approaches
Source: MDPI journal article supplement (doi:10.3390/biology12060786), 2023-05-29
Supplement: s1 [file s1]

## Supplementary File

**Table S1.** Environmental variables used for modelling the distribution of KMD in the western Himalayas.

| S. No. | Variable                                                                                                              | Code  | Data                                                   | Source    |
|--------|-----------------------------------------------------------------------------------------------------------------------|-------|--------------------------------------------------------|-----------|
| 1      | Bio2                                                                                                                  | Bio2  | Worldclim                                              | Worldclim |
| 2      | Bio5                                                                                                                  | Bio5  |                                                        |           |
| 3      | Bio9                                                                                                                  | Bio9  |                                                        |           |
| 4      | Bio11                                                                                                                 | Bio11 |                                                        |           |
| 5      | Bio13                                                                                                                 | Bio13 |                                                        |           |
| 6      | Bio14                                                                                                                 | Bio14 |                                                        |           |
| 7      | Bio15                                                                                                                 | Bio15 |                                                        |           |
| 8      | Bio19                                                                                                                 | Bio19 |                                                        |           |
| 9      | Grass land<br>(dominated by<br>herbaceous<br>annuals)                                                                 | Grass | MCD12Q1                                                | USGS      |
| 10     | Mixed forest                                                                                                          | MF    |                                                        |           |
| 11     | Evergreen needle<br>leaf forest                                                                                       | ENF   |                                                        |           |
| 12     | Permanent snow<br>and ice (at least<br>60% of area is<br>covered by snow<br>for at least 10<br>months of the<br>year) | SN    |                                                        |           |
| 13     | Distance to water                                                                                                     | WA    | Calculated using log Euclidean<br>distance (Arcgis 10) | Diva gis  |
| 14     | Distance to road                                                                                                      | RD    |                                                        |           |
| 15     | Elevation                                                                                                             | ELE   | SRTM                                                   | USGS      |
| 16     | Slope                                                                                                                 | SLP   |                                                        |           |
| 17     | Aspect                                                                                                                | ASP   |                                                        |           |
| 18     | Human footprint                                                                                                       | HFP   | EARTHDATA                                              | SEDAC     |

**Table S2.** Mitochondrial genetic diversity in Kashmir Musk deer.

|     | N  | P | H | Nucleotide<br>Diversity( $\pi$ ) | Hd          |
|-----|----|---|---|----------------------------------|-------------|
| KMD | 39 | 3 | 3 | 0.00356±0.0001                   | 0.555±0.037 |

**Table S3.** Sequence divergence between the species and rows and columns shaded are shown sequence divergence in Kashmir Musk deer.

|        | KMD_H1 | KMD_H2 | KMD_H3 | Mfus  | Mlu   | Mch   | Man   | Mber  | Mmo |
|--------|--------|--------|--------|-------|-------|-------|-------|-------|-----|
| KMD_H1 |        |        |        |       |       |       |       |       |     |
| KMD_H2 | 0.007  |        |        |       |       |       |       |       |     |
| KMD_H3 | 0.003  | 0.009  |        |       |       |       |       |       |     |
| Mfus   | 0.114  | 0.114  | 0.118  |       |       |       |       |       |     |
| Mlu    | 0.107  | 0.107  | 0.111  | 0.010 |       |       |       |       |     |
| Mch    | 0.111  | 0.111  | 0.115  | 0.020 | 0.016 |       |       |       |     |
| Man    | 0.103  | 0.103  | 0.107  | 0.086 | 0.073 | 0.076 |       |       |     |
| Mber   | 0.092  | 0.092  | 0.095  | 0.075 | 0.062 | 0.066 | 0.023 |       |     |
| Mmo    | 0.107  | 0.107  | 0.111  | 0.094 | 0.084 | 0.096 | 0.073 | 0.069 |     |

Siberian musk deer (*Moschus moschiferus*), Chinese forest musk deer (*M. berezovskii*), Anhui musk deer (*M. anhuiensis*), Alpine musk deer (*M. chrysogaster*), Himalayan musk deer (*M. leucogaster*), Mfus- (*M. fuscus*) and Kashmir musk deer (*M. cupreus*).
